# Supplementary material for: Multivariate Analysis Reveals That Unsubstituted β-Ring and C8-Keto Structures Are Important Factors for Anti-Inflammatory Activity of Carotenoids
Source: MDPI journal article supplement (doi:10.3390/nu13113699), 2021-10-21
Supplement: s1 [file nutrients-1393425-supplementary.pdf › nutrients-1393425-supplementary.pdf]

## Supplementary Information

### Multivariate Analysis Reveals that Unsubstituted $\beta$ -Ring and C8-Keto Structures are Important Factors for Anti-Inflammatory Activity of Carotenoids

Yuki Manabe, Nami Tomonaga, Takashi Maoka and Tatsuya Sugawara

#### TABLE OF CONTENTS

Figure S1. Effects of 0.5 and 1.0  $\mu$ M of siphonaxanthin on the activity of NF- $\kappa$ B in AGE-BSA-, LPS-, or TNF- $\alpha$ -stimulated THP1-Dual cells

Figure S2. Effects of antagonism of RAR on suppression of TNF- $\alpha$ -NF- $\kappa$ B axis and promotion of PMA-IRF axis by  $\beta$ -carotene

Figure S3. LC-MS/MS analysis of retinoids

Figure S4. HPLC-PDA analysis of siphonaxanthin and its metabolites

Table S1. The parameters for the MRM detection in LC-MS analysis of carotenoids and retinoids.

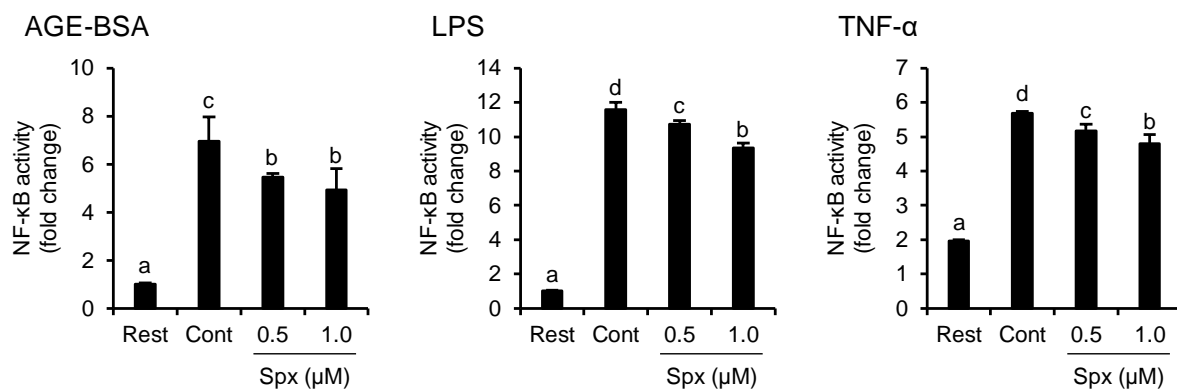

**Figure S1. Effects of 0.5 and 1.0  $\mu$ M of siphonaxanthin on the activity of NF- $\kappa$ B in AGE-BSA-, LPS-, or TNF- $\alpha$ -stimulated THP1-Dual cells.** THP1-Dual cells were incubated with 0.5 or 1.0  $\mu$ M of siphonaxanthin, followed by stimulation with the indicated agent. Siphonaxanthin was dispersed in culture medium using DMSO (maximum final concentration, 0.1%) as a vehicle. The resting cell and control groups were incubated for 24 h, followed by no stimulation or stimulation with inflammatory inducer, respectively. After stimulation, SEAP activities in the supernatant were measured ( $n = 4$ ). Values represent mean  $\pm$  SD. Significant differences were detected by one-way ANOVA in AGE-BSA ( $F(3,12) = 55.0$ ,  $p < 0.05$ ), LPS ( $F(3,12) = 1317$ ,  $p < 0.05$ ), and TNF- $\alpha$  ( $F(3,12) = 402$ ,  $p < 0.05$ ). The different characters represent significant differences among treatments ( $p < 0.05$ , Tukey-Kramer test). Rest, resting cells; Cont, control; Spx, siphonaxanthin.

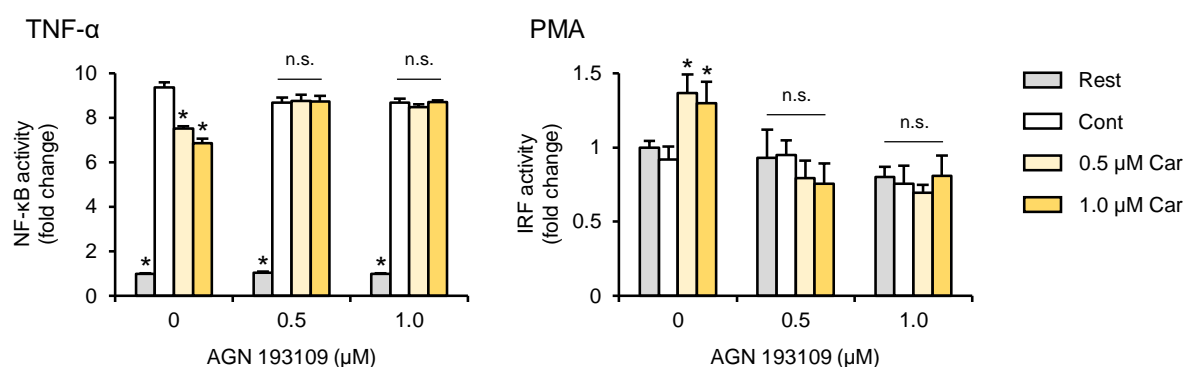

**Figure S2. Effects of antagonism of RAR on suppression of TNF- $\alpha$ -NF- $\kappa$ B axis and promotion of PMA-IRF axis by  $\beta$ -carotene.** THP1-Dual cells were incubated with 0.5 or 1.0  $\mu$ M of  $\beta$ -carotene with 0.5 or 1.0  $\mu$ M of AGN 193109, an antagonist for RAR, followed by stimulation with the indicated agent.  $\beta$ -carotene and AGN 193109 were dispersed in culture medium using DMSO (maximum final concentration, 0.1%) as a vehicle. The resting cell and control groups were incubated for 24 h, followed by no stimulation or stimulation with inflammatory inducer, respectively. After stimulation, SEAP and luciferase activities in the supernatant were measured ( $n = 4$ ). Values represent mean  $\pm$  SD. Significant differences were detected by one-way ANOVA in TNF- $\alpha$  ( $F(11,36) = 1660$ ,  $p < 0.05$ ), and PMA ( $F(11,36) = 13.13$ ,  $p < 0.05$ ). The asterisks \* indicate significant difference from the control group, and n.s. indicates no significance ( $p < 0.05$ , Tukey-Kramer test). Rest, resting cells; Cont, control; Car,  $\beta$ -carotene.

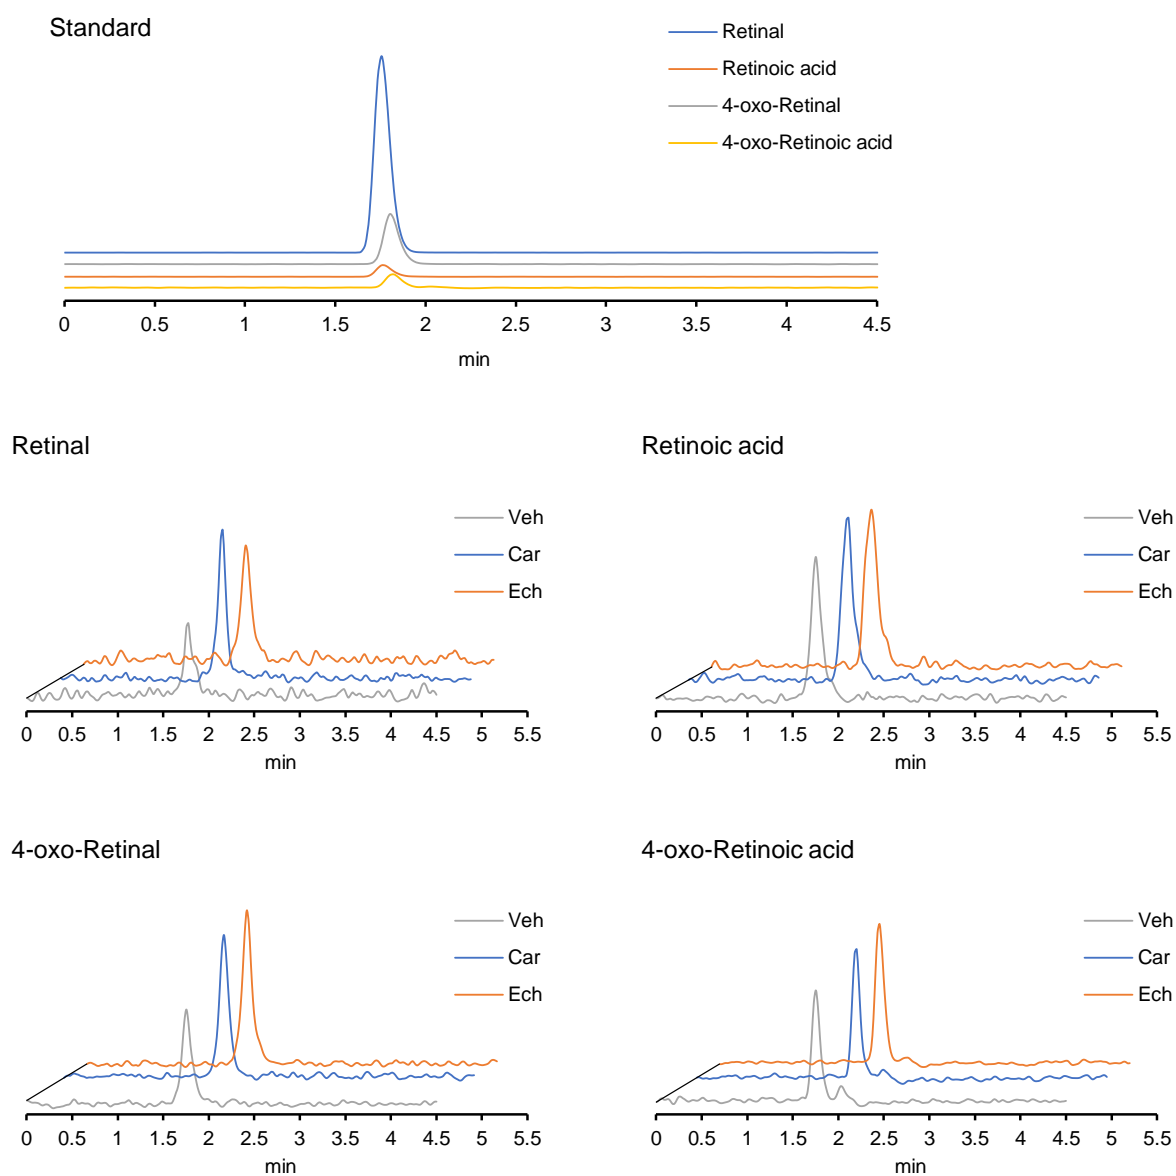

**Figure S3. LC-MS/MS analysis of retinoids.** Authentic standards and total lipids extracted from the cells were subjected to LC-MS/MS analysis. MRM chromatograms are illustrated.

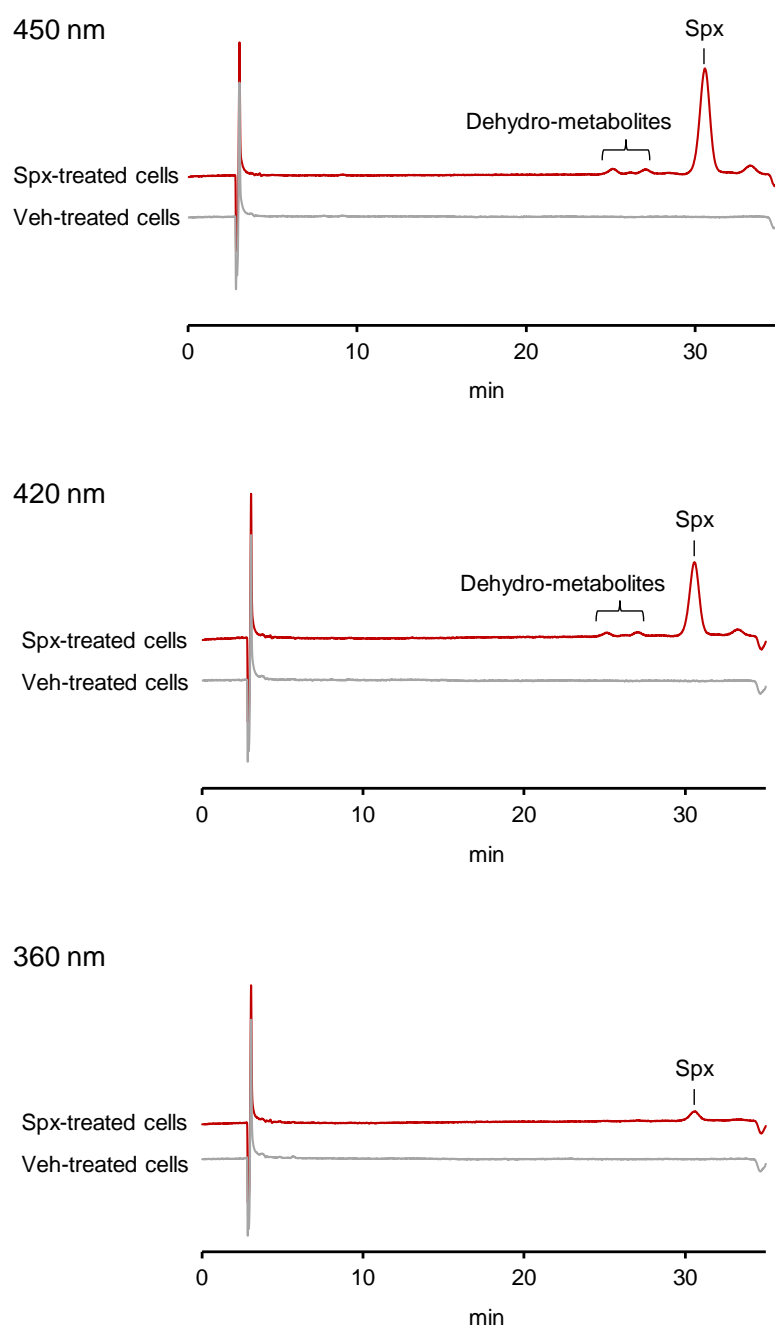

**Figure S4. HPLC-PDA analysis of siphonaxanthin and its metabolites.** Total lipids extracted from the cells were subjected to HPLC-PDA analysis. Chromatograms at 450 nm, 420 nm, and 360 nm are illustrated.

**Table S1. The parameters for the MRM detection in LC-MS analysis of carotenoids and retinoids.**

Q1, Q1 m/z; Q3, Q3 m/z; DP, declustering potential (volts); EP, entrance potential (volts); CE, collision energy (volts); CXP, collision cell exit potential (volts).

| <i>Target</i>       | <i>Q1</i> | <i>Q3</i> | <i>DP</i> | <i>EP</i> | <i>CE</i> | <i>CXP</i> |
|---------------------|-----------|-----------|-----------|-----------|-----------|------------|
| β-Carotene          | 536.3     | 444.4     | 116       | 10        | 21        | 18         |
| Echinenone          | 551.3     | 91.0      | 156       | 10        | 113       | 12         |
| Zeaxanthin          | 568.3     | 91.0      | 111       | 10        | 119       | 12         |
| Astaxanthin         | 597.3     | 147.1     | 106       | 10        | 25        | 18         |
| Alloxanthin         | 565.3     | 91.0      | 116       | 10        | 107       | 14         |
| Lutein              | 568.3     | 77.0      | 91        | 10        | 129       | 12         |
| Siphonaxanthin      | 601.3     | 91.0      | 101       | 10        | 125       | 12         |
| Fucoxanthin         | 659.3     | 109.1     | 116       | 10        | 27        | 14         |
| Fucoxanthinol       | 617.3     | 109.1     | 136       | 10        | 25        | 14         |
| Retinal             | 285.0     | 161.1     | 76        | 10        | 13        | 14         |
| Retinoic acid       | 301.1     | 123.1     | 106       | 10        | 19        | 16         |
| 4-oxo-Retinal       | 299.1     | 77.1      | 111       | 10        | 89        | 12         |
| 4-oxo-Retinoic acid | 314.8     | 115.1     | 111       | 10        | 95        | 14         |
